# Supplementary material for: Improved ethanol gas sensing performances of a ZnO/Co3O4 composite induced by its flytrap-like structure
Source: Royal Society of Chemistry journal article supplement (doi:10.1039/c7cp05228f), 2017-01-01
Supplement: c7cp05228f1.pdf [file c7cp05228f1.pdf]

## Supporting Information:

### Improved Ethanol Gas Sensing Performances of ZnO/Co<sub>3</sub>O<sub>4</sub> Composite Induced by its Flytrap-like Structure

*Keng Xu<sup>a</sup>, Li Yang<sup>b</sup>, Yong Yang<sup>a</sup> Cailei Yuan<sup>a</sup>*

<sup>a</sup>Jiangxi Key Laboratory of Nanomaterials and Sensors, Jiangxi Key Laboratory of Photoelectronics and Telecommunication, School of Physics, Communication and Electronics, Jiangxi Normal University, Nanchang 330022, Jiangxi, P.R. China

<sup>b</sup>Faculty of Metallurgical and Energy Engineering, Kunming University of Science and Technology, Kunming 650093, China

Corresponding Author. [Tel:0791-88120370](tel:0791-88120370);

Email address: [xukeng@163.com](mailto:xukeng@163.com)

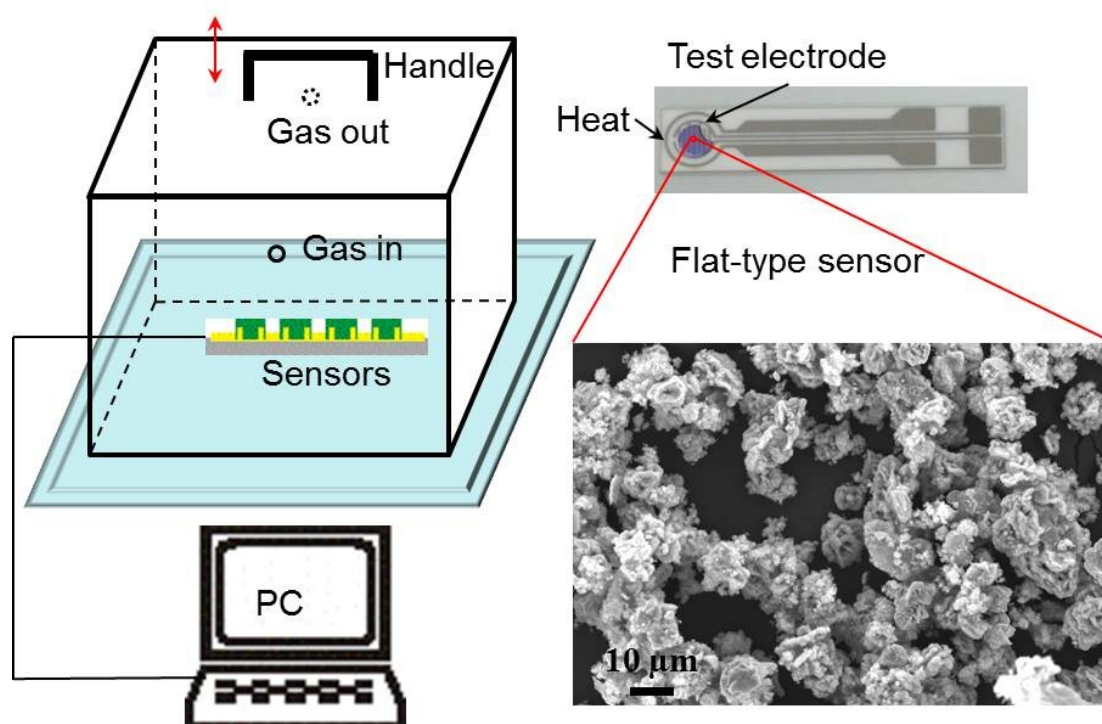

**Figure S1** Schematic diagram of the gas-sensing measurement system. The right is the structure of the sensor and the morphology of sensing film ( $\text{ZnO}/\text{Co}_3\text{O}_4$ ) on the surface of sensor.

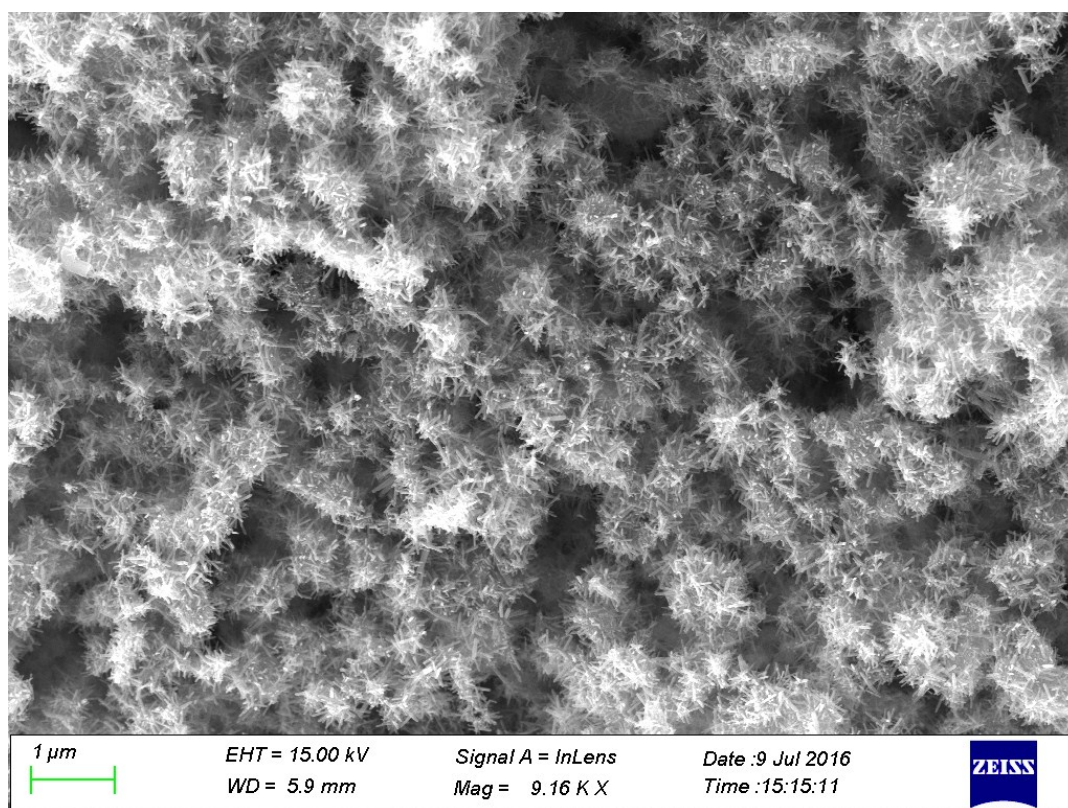

**Figure S2** SEM images of pristine ZnO.

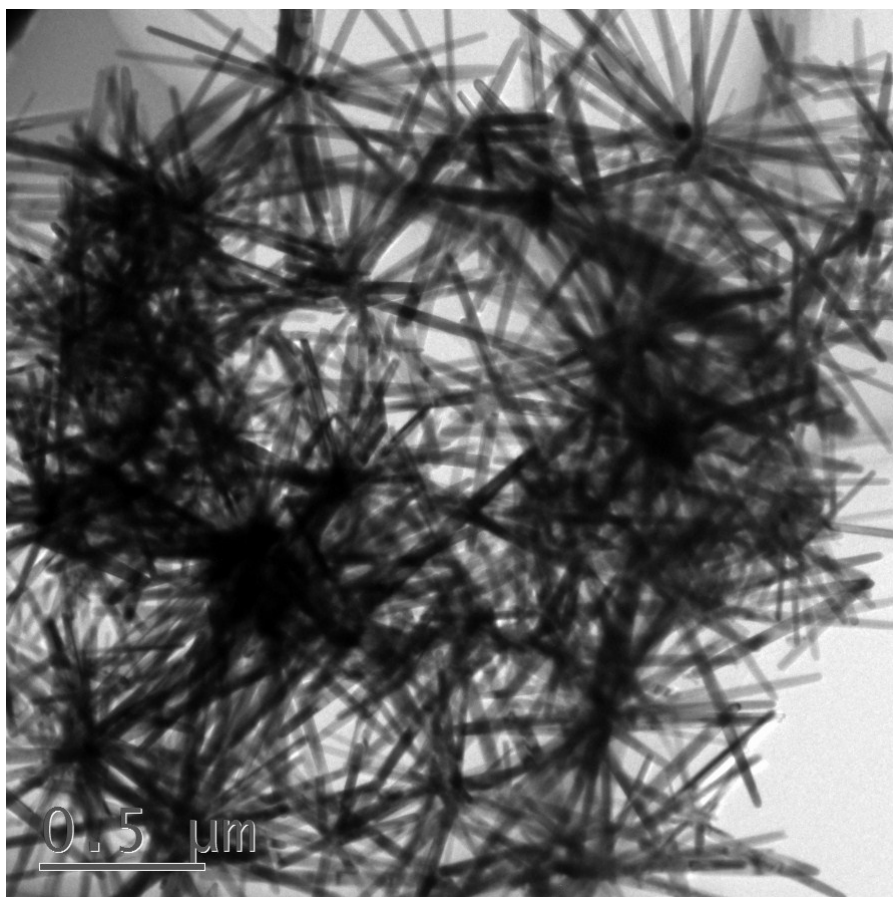

**Figure S3** TEM images of pristine ZnO.

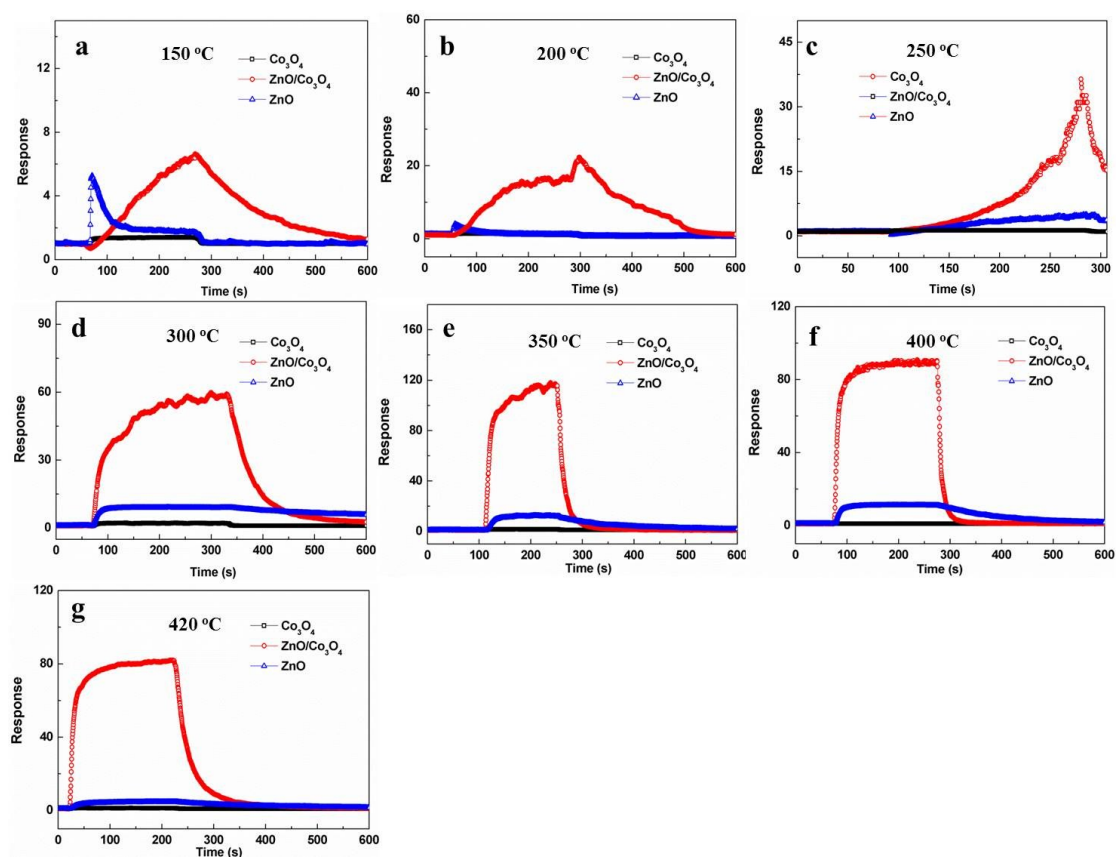

**Figure S4** Typical transient response of  $\text{Co}_3\text{O}_4$ ,  $\text{ZnO}/\text{Co}_3\text{O}_4$  and  $\text{ZnO}$  to 100 ppm ethanol at (a) 150 °C, (b) 200 °C, (c) 250 °C, (d) 300 °C, (e) 350 °C, (f) 400 °C, (g) 420 °C.

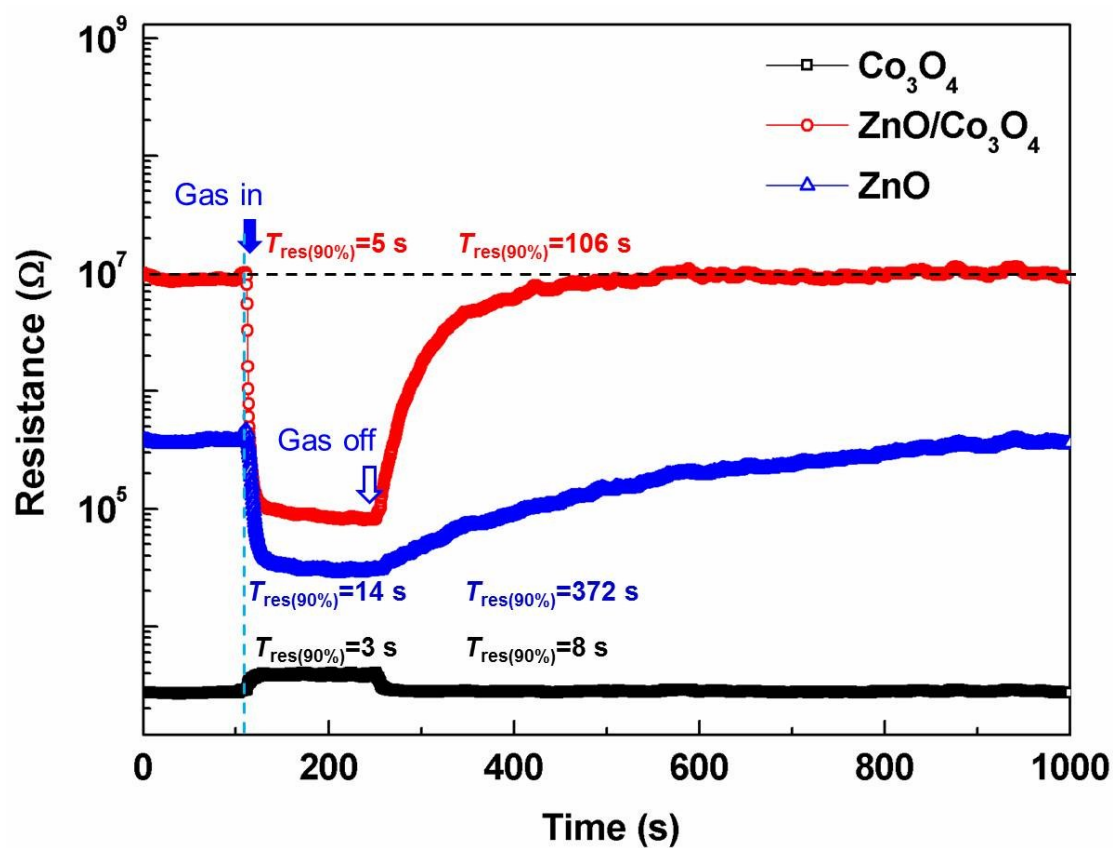

**Figure S5** Typical response and recovery curve of  $\text{Co}_3\text{O}_4$ ,  $\text{ZnO}/\text{Co}_3\text{O}_4$  and  $\text{ZnO}$  to 100 ppm ethanol at 350 °C.
